# Supplementary material for: Complexation with Polysaccharides Enhances the Stability of Isolated Anthocyanins
Source: MDPI journal article supplement (doi:10.3390/foods12091846), 2023-04-29

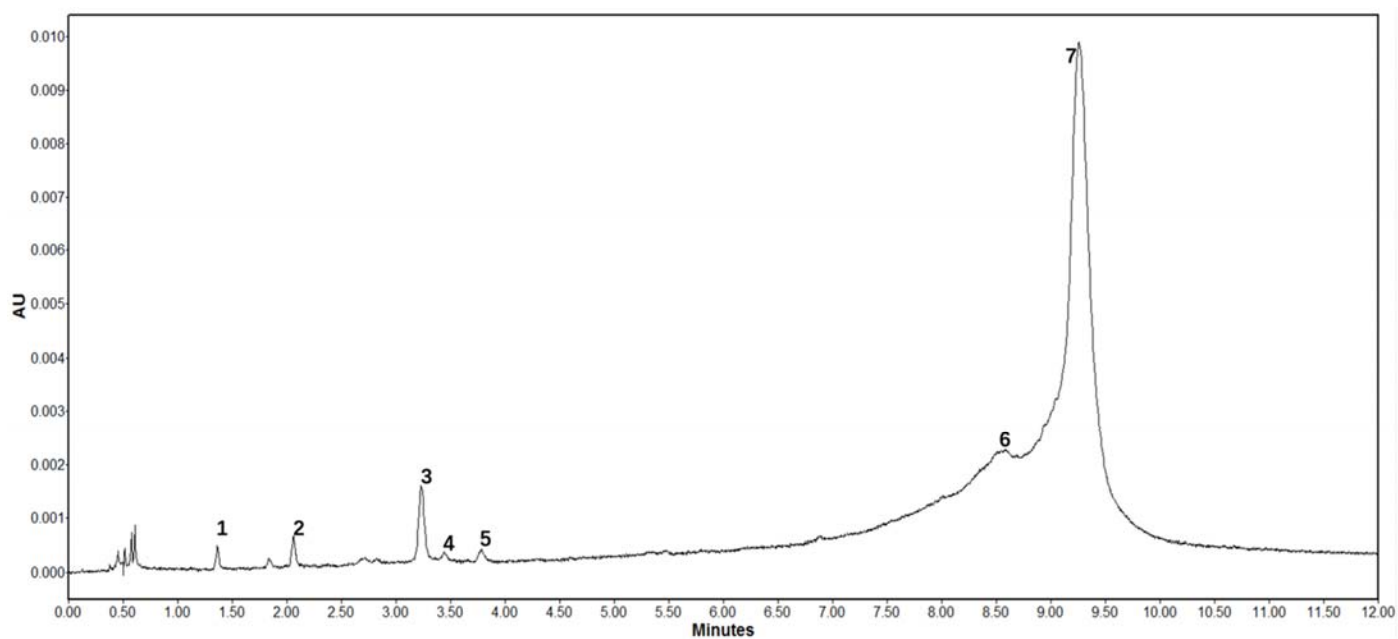

**Figure S1.** Illustrative UPLC chromatogram of the anthocyanin fraction from purple potatoes. Peak assignment: 1. gallic acid; 2. protocatechuic acid; 3. chlorogenic acid; 4. caffeic acid; 5. p-coumaric acid; 6. malvidin chloride; 7. petunidin chloride.

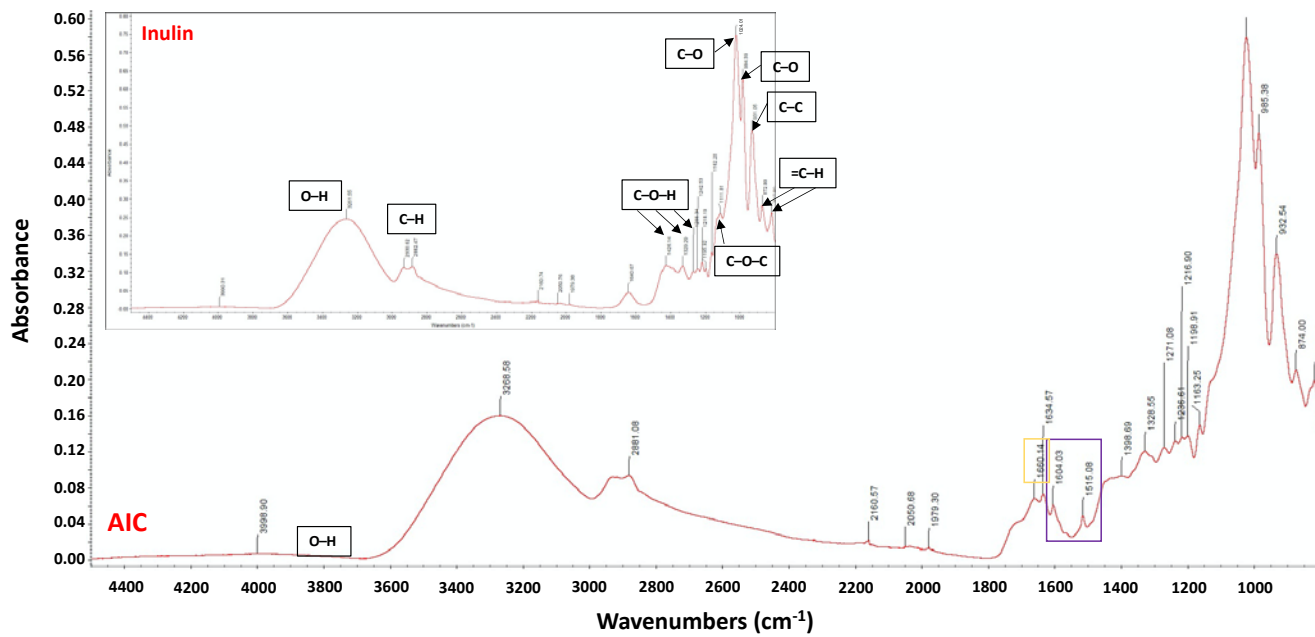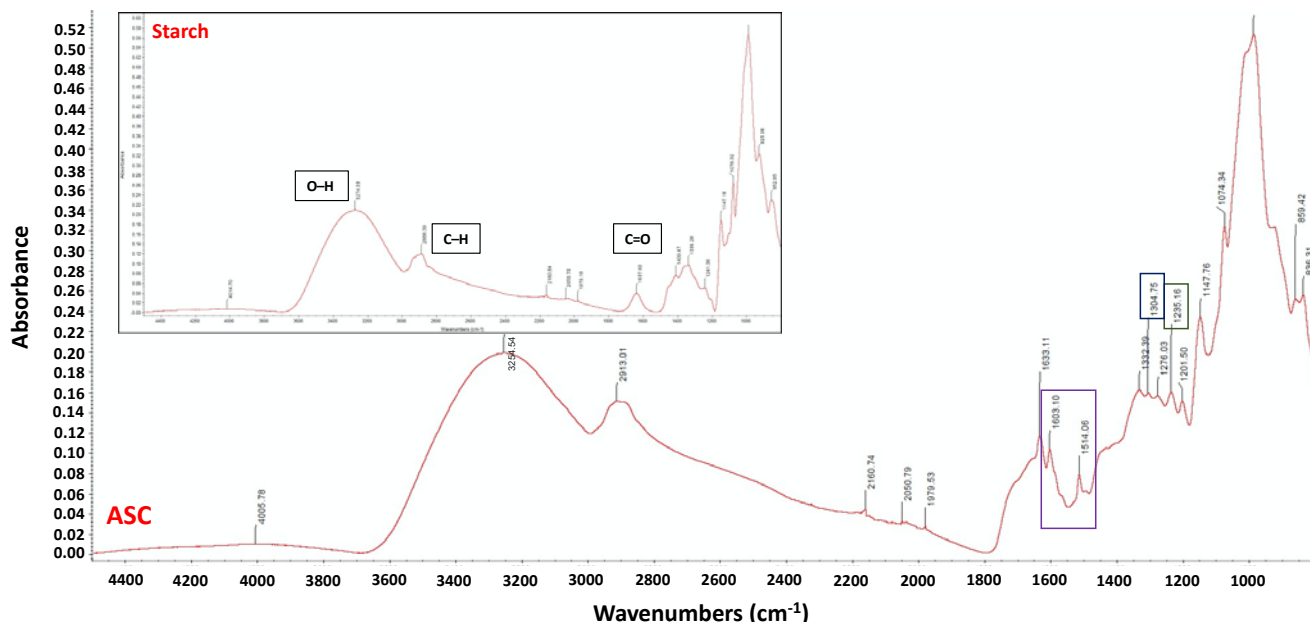

Supplement: s1 [file s1]
